# Supplementary material for: Long-term effect of the eradication of Helicobacter pylori on the hemoglobin A1c in type 2 diabetes or prediabetes patients
Source: PubMed Central journal article supplement — Korean J Intern Med. 2022 Jan 7;37(3):579–90. doi: 10.3904/kjim.2021.194 (PMC9082431; doi:10.3904/kjim.2021.194), 2022-01-07
Supplement: kjim-2021-194-suppl2.pdf [file kjim-2021-194-suppl2.pdf]

**Supplementary Table 2. Changes in glyated hemoglobin A1c in T2DM or preDM patients according to *Helicobacter pylori* status at each time point of follow-up compared to baseline**

| Variable                   | <i>H. pylori</i> -negative | <i>H. pylori</i> -positive |                       | <i>p</i> value <sup>a</sup> | <i>p</i> value <sup>b</sup> |
|----------------------------|----------------------------|----------------------------|-----------------------|-----------------------------|-----------------------------|
|                            |                            | Non-eradicated             | Eradicated            |                             |                             |
| 1-year follow-up (n = 114) | 0.29 ± 0.12 (n = 37)       | 0.23 ± 0.11 (n = 33)       | -0.13 ± 0.07 (n = 44) | 0.006 <sup>c</sup>          | 0.005 <sup>c</sup>          |
| 5-year follow-up (n = 62)  | 0.47 ± 0.18 (n = 18)       | 0.40 ± 0.13 (n = 19)       | -0.10 ± 0.08 (n = 25) | 0.001 <sup>c</sup>          | 0.002 <sup>c</sup>          |

Values are presented as mean ± standard error.

T2DM, type 2 diabetes mellitus; PreDM, prediabetes.

<sup>a</sup>Student's *t* test.

<sup>b</sup>Analysis of variance (ANOVA) were used.

<sup>c</sup>Statistically significance (*p* < 0.05).
