# Supplementary material for: Long-term effect of the eradication of Helicobacter pylori on the hemoglobin A1c in type 2 diabetes or prediabetes patients
Source: PubMed Central journal article supplement — Korean J Intern Med. 2022 Jan 7;37(3):579–90. doi: 10.3904/kjim.2021.194 (PMC9082431; doi:10.3904/kjim.2021.194), 2022-01-07
Supplement: kjim-2021-194-suppl3.pdf [file kjim-2021-194-suppl3.pdf]

**Supplementary Table 3. Subgroup analysis depending on *Helicobacter pylori* status at each time points of follow-up**

| Variable         | <i>H. pylori</i> -negative | <i>H. pylori</i> -positive |               | <i>p</i> value <sup>a</sup> | <i>p</i> value <sup>b</sup> |
|------------------|----------------------------|----------------------------|---------------|-----------------------------|-----------------------------|
|                  |                            | Non-eradicated             | Eradicated    |                             |                             |
| <b>TG</b>        |                            |                            |               |                             |                             |
| 1 year (n = 95)  | -1.24 ± 12.19              | -16.35 ± 15.02             | -6.43 ± 7.85  | 0.525                       | 0.667                       |
| 5 years (n = 66) | -18.83 ± 20.33             | -34.59 ± 16.85             | 12.57 ± 11.38 | 0.055                       | 0.138                       |
| <b>HDL-C</b>     |                            |                            |               |                             |                             |
| 1 year (n = 95)  | 0.31 ± 1.37                | 1.08 ± 2.19                | 2.41 ± 1.28   | 0.575                       | 0.601                       |
| 5 years (n = 66) | 2.72 ± 2.60                | -2.24 ± 2.18               | 2.19 ± 1.57   | 0.105                       | 0.125                       |
| <b>LDL-C</b>     |                            |                            |               |                             |                             |
| 1 year (n = 86)  | -7.74 ± 3.93               | -15.41 ± 7.22              | -2.03 ± 3.90  | 0.080                       | 0.161                       |
| 5 years (n = 65) | -13.38 ± 8.54              | -5.95 ± 10.29              | -2.37 ± 5.24  | 0.734                       | 0.606                       |
| <b>TC</b>        |                            |                            |               |                             |                             |
| 1 year (n = 81)  | -7.66 ± 4.53               | -13.43 ± 8.05              | 1.46 ± 6.74   | 0.178                       | 0.280                       |
| 5 years (n = 58) | -14.29 ± 9.87              | -5.29 ± 8.96               | 2.46 ± 6.74   | 0.503                       | 0.341                       |
| <b>FPG</b>       |                            |                            |               |                             |                             |
| 1 year (n = 51)  | 10.74 ± 6.03               | 2.13 ± 5.24                | -9.25 ± 6.92  | 0.200                       | 0.075                       |
| 5 years (n = 22) | 9.38 ± 15.31               | 16.30 ± 20.58              | -2.50 ± 13.21 | 0.593                       | 0.835                       |
| <b>BMI</b>       |                            |                            |               |                             |                             |
| 1 year (n = 75)  | -0.29 ± 0.43               | -0.66 ± 0.37               | -0.62 ± 0.44  | 0.957                       | 0.820                       |
| 5 years (n = 46) | -0.28 ± 0.52               | 0.15 ± 1.04                | -0.80 ± 0.55  | 0.391                       | 0.621                       |
| <b>SBP</b>       |                            |                            |               |                             |                             |
| 1 year (n = 51)  | -1.86 ± 9.03               | -1.93 ± 7.66               | -8.05 ± 5.30  | 0.502                       | 0.755                       |
| 5 years (n = 49) | -2.07 ± 10.75              | -10.58 ± 7.00              | -6.39 ± 4.84  | 0.653                       | 0.759                       |
| <b>DBP</b>       |                            |                            |               |                             |                             |
| 1 year (n = 51)  | -0.86 ± 4.40               | -2.29 ± 3.33               | -4.22 ± 2.66  | 0.655                       | 0.765                       |
| 5 years (n = 49) | -6.14 ± 6.06               | -7.67 ± 4.36               | -3.96 ± 2.69  | 0.452                       | 0.812                       |

Data are presented as mean ± standard error.

TG, triglyceride; HDL-C, high-density lipoprotein cholesterol; LDL-C, low-density lipoprotein cholesterol; TC, total cholesterol; FPG, fasting plasma glucose; BMI, body mass index; SBP, systolic blood pressure; DBP, diastolic blood pressure.

<sup>a</sup>Student's *t* test.

<sup>b</sup>Analysis of variance (ANOVA) were used.
