# Supplementary material for: Long-term effect of the eradication of Helicobacter pylori on the hemoglobin A1c in type 2 diabetes or prediabetes patients
Source: PubMed Central journal article supplement — Korean J Intern Med. 2022 Jan 7;37(3):579–90. doi: 10.3904/kjim.2021.194 (PMC9082431; doi:10.3904/kjim.2021.194), 2022-01-07
Supplement: kjim-2021-194-suppl4.pdf [file kjim-2021-194-suppl4.pdf]

**Supplementary Table 4. Subgroup analysis depending on sex and *Helicobacter pylori* status at each time point of follow-up**

| Variable         | <i>H. pylori</i> -negative | <i>H. pylori</i> -positive |                | <i>p</i> value <sup>a</sup> | <i>p</i> value <sup>b</sup> |
|------------------|----------------------------|----------------------------|----------------|-----------------------------|-----------------------------|
|                  |                            | Non-eradicated             | Eradicated     |                             |                             |
| <b>Male</b>      |                            |                            |                |                             |                             |
| TG               |                            |                            |                |                             |                             |
| 1 year (n = 55)  | -16.44 ± 18.49             | -5.35 ± 19.81              | -3.05 ± 11.79  | 0.917                       | 0.832                       |
| 5 years (n = 33) | -69.71 ± 27.11             | -48.56 ± 20.08             | 5.41 ± 12.77   | 0.026                       | 0.013                       |
| HDL-C            |                            |                            |                |                             |                             |
| 1 year (n = 55)  | 2.25 ± 1.68                | 0.25 ± 2.93                | 0.91 ± 1.85    | 0.843                       | 0.821                       |
| 5 years (n = 33) | -0.29 ± 1.80               | -3.22 ± 2.43               | 1.06 ± 1.56    | 0.136                       | 0.281                       |
| LDL-C            |                            |                            |                |                             |                             |
| 1 year (n = 52)  | -6.27 ± 5.32               | -12.53 ± 7.88              | -0.59 ± 4.71   | 0.175                       | 0.350                       |
| 5 years (n = 37) | -22.43 ± 8.38              | -0.75 ± 13.09              | 3.33 ± 5.88    | 0.753                       | 0.215                       |
| TC               |                            |                            |                |                             |                             |
| 1 year (n = 48)  | -6.83 ± 5.36               | -12.07 ± 8.67              | 1.46 ± 7.10    | 0.362                       | 0.589                       |
| 5 years (n = 32) | -36.66 ± 10.14             | -7.15 ± 8.84               | 5.24 ± 8.27    | 0.370                       | 0.018                       |
| FPG              |                            |                            |                |                             |                             |
| 1 year (n = 34)  | 10.00 ± 7.43               | 5.45 ± 7.19                | -9.91 ± 7.05   | 0.143                       | 0.144                       |
| 5 years (n = 15) | 1.33 ± 22.85               | 21.88 ± 25.62              | -2.50 ± 3.20   | 0.537                       | 0.761                       |
| BMI              |                            |                            |                |                             |                             |
| 1 year (n = 44)  | -0.73 ± 0.41               | -0.90 ± 0.42               | -0.13 ± 0.57   | 0.282                       | 0.483                       |
| 5 years (n = 22) | -0.08 ± 0.28               | -0.66 ± 1.28               | 0.70 ± 0.82    | 0.359                       | 0.592                       |
| SBP              |                            |                            |                |                             |                             |
| 1 year (n = 31)  | -4.25 ± 13.14              | -12.00 ± 8.68              | -2.85 ± 7.38   | 0.429                       | 0.752                       |
| 5 years (n = 29) | -6.44 ± 14.40              | -17.25 ± 7.96              | -4.64 ± 6.86   | 0.247                       | 0.656                       |
| DBP              |                            |                            |                |                             |                             |
| 1 year (n = 31)  | 0.25 ± 6.47                | -6.20 ± 3.64               | -3.92 ± 4.22   | 0.697                       | 0.663                       |
| 5 years (n = 29) | -10.89 ± 6.99              | -10.00 ± 5.59              | -4.64 ± 5.00   | 0.487                       | 0.701                       |
| <b>Female</b>    |                            |                            |                |                             |                             |
| TG               |                            |                            |                |                             |                             |
| 1 year (n = 40)  | 17.46 ± 13.96              | -37.11 ± 21.73             | -10.56 ± 10.12 | 0.215                       | 0.056                       |
| 5 years (n = 33) | -13.55 ± 24.50             | 5.71 ± 15.87               | 21.13 ± 19.77  | 0.626                       | 0.894                       |
| HDL-C            |                            |                            |                |                             |                             |
| 1 year (n = 40)  | -2.08 ± 2.17               | 2.56 ± 3.30                | 4.16 ± 1.72    | 0.637                       | 0.113                       |
| 5 years (n = 33) | 4.64 ± 4.08                | -3.14 ± 3.85               | 3.47 ± 2.87    | 0.198                       | 0.369                       |
| LDL-C            |                            |                            |                |                             |                             |
| 1 year (n = 34)  | -9.58 ± 6.05               | -21.57 ± 15.96             | -4.13 ± 6.86   | 0.249                       | 0.423                       |
| 5 years (n = 28) | -6.33 ± 13.70              | -14.86 ± 17.41             | -10.92 ± 9.49  | 0.830                       | 0.909                       |
| TC               |                            |                            |                |                             |                             |
| 1 year (n = 33)  | -8.70 ± 7.95               | -15.77 ± 17.03             | 5.84 ± 13.35   | 0.347                       | 0.488                       |
| 5 years (n = 26) | 3.11 ± 13.36               | -2.80 ± 18.41              | -1.82 ± 11.86  | 0.963                       | 0.951                       |
| FPG              |                            |                            |                |                             |                             |
| 1 year (n = 17)  | 12.00 ± 11.06              | -5.20 ± 5.04               | -7.80 ± 17.34  | 0.889                       | 0.446                       |
| 5 years (n = 7)  | 14.20 ± 22.01              | -6.00 ± 8.00               |                |                             | 0.609                       |

**Supplementary Table 4. Continued**

| Variable         | <i>H. pylori</i> -negative | <i>H. pylori</i> -positive |               | <i>p</i> value <sup>a</sup> | <i>p</i> value <sup>b</sup> |
|------------------|----------------------------|----------------------------|---------------|-----------------------------|-----------------------------|
|                  |                            | Non-eradicated             | Eradicated    |                             |                             |
| <b>BMI</b>       |                            |                            |               |                             |                             |
| 1 year (n = 31)  | 0.20 ± 0.79                | 0.35 ± 0.66                | -1.09 ± 0.65  | 0.315                       | 0.353                       |
| 5 years (n = 24) | -0.39 ± 0.83               | 2.03 ± 1.51                | -1.97 ± 0.58  | 0.014 <sup>c</sup>          | 0.027 <sup>c</sup>          |
| <b>SBP</b>       |                            |                            |               |                             |                             |
| 1 year (n = 20)  | 1.33 ± 12.99               | 18.20 ± 11.16              | -15.56 ± 7.08 | 0.020 <sup>c</sup>          | 0.085                       |
| 5 years (n = 20) | 5.80 ± 16.77               | 2.75 ± 12.40               | -8.75 ± 7.06  | 0.430                       | 0.566                       |
| <b>DBP</b>       |                            |                            |               |                             |                             |
| 1 year (n = 20)  | -2.33 ± 6.23               | 7.50 ± 4.94                | -4.60 ± 2.99  | 0.054                       | 0.232                       |
| 5 years (n = 20) | 2.40 ± 11.39               | -3.00 ± 14.45              | -3.33 ± 2.65  | 0.957                       | 0.771                       |

Data are presented as mean ± standard error.

TG, triglyceride; HDL-C, high-density lipoprotein cholesterol; LDL-C, low-density lipoprotein cholesterol; TC, total cholesterol; FPG, fasting plasma glucose; BMI, body mass index; SBP, systolic blood pressure; DBP, diastolic blood pressure.

<sup>a</sup>Student's *t* test.

<sup>b</sup>Analysis of variance (ANOVA) were used.

<sup>c</sup>Statistically significance (*p* < 0.05).
