# Supplementary material for: Long-term effect of the eradication of Helicobacter pylori on the hemoglobin A1c in type 2 diabetes or prediabetes patients
Source: PubMed Central journal article supplement — Korean J Intern Med. 2022 Jan 7;37(3):579–90. doi: 10.3904/kjim.2021.194 (PMC9082431; doi:10.3904/kjim.2021.194), 2022-01-07
Supplement: kjim-2021-194-suppl5.pdf [file kjim-2021-194-suppl5.pdf]

**Supplementary Table 5. Correlation between metabolic syndrome with *Helicobacter pylori* status over time**

| Variable         | <i>H. pylori</i> -negative | <i>H. pylori</i> -positive |            | <i>p</i> value <sup>a</sup> |
|------------------|----------------------------|----------------------------|------------|-----------------------------|
|                  |                            | Non-eradicated             | Eradicated |                             |
| 1-year follow-up | 9                          | 11                         | 19         | 0.535                       |
| MS               | 6 (66.7)                   | 7 (63.6)                   | 9 (47.4)   |                             |
| OR               | 1.05                       | Reference                  | 1.34       |                             |
| 5-year follow-up | 4                          | 7                          | 14         | 0.950                       |
| MS               | 2 (50)                     | 3 (42.9)                   | 7 (50)     |                             |
| OR               | 1.16                       | Reference                  | 1.16       |                             |

Data are presented as number (%).

MS, metabolic syndrome; OR, odds ratio.

<sup>a</sup>Analysis of variance (ANOVA) was used.
